# Supplementary material
Source: publisher figshare collection journal article supplement (https://karger.figshare.com/ndownloader/files/37442824)

**Supplementary Figure Legends**

Fig. S1. Progression-free survival, postprogression survival, and overall survival of all patients in this study.

Fig. S2. Progression-free survival, postprogression survival, and overall survival of patients who received fluoropyrimidines plus platinum based chemotherapy according to clinical trial eligibility.


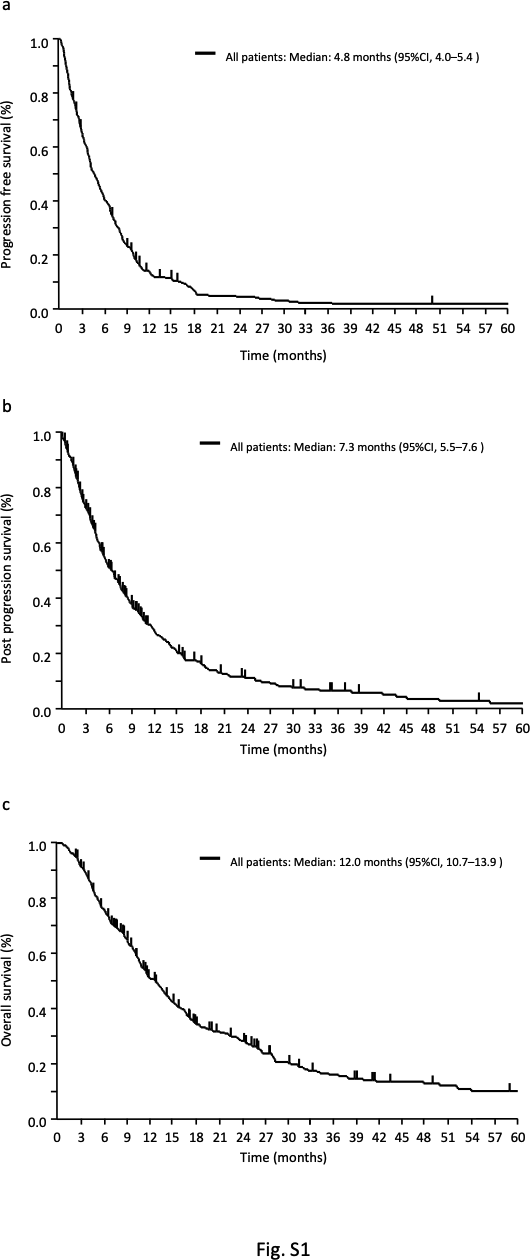


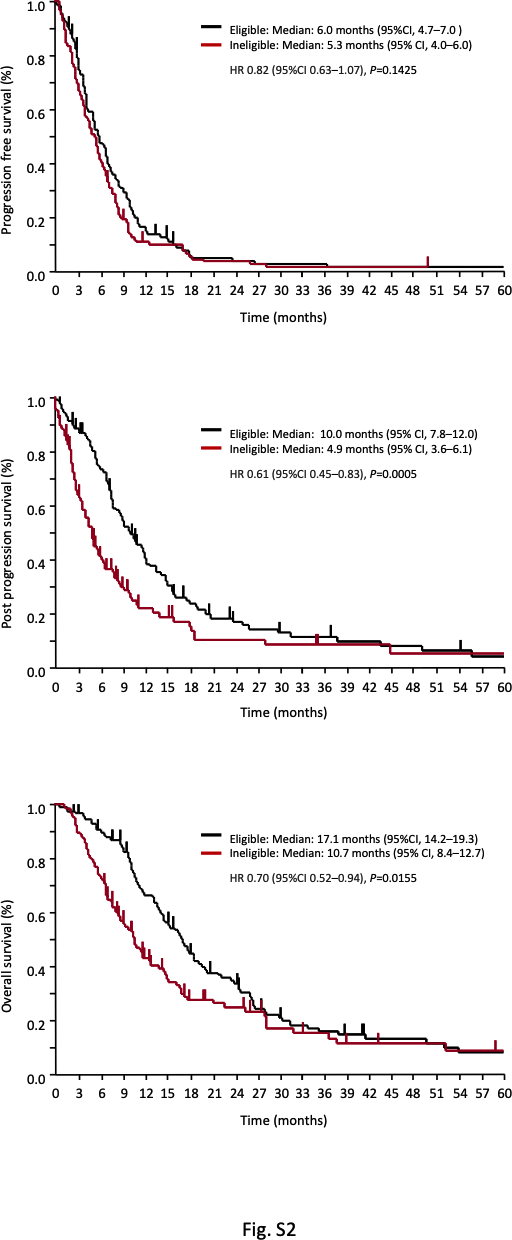

Supplement: Supplementary file 1 [file 37442824]
